# Supplementary material
Source: HighWire-hosted journal article supplement (http://www.qdcxjkg.com/highwire/filestream/129362/field_highwire_adjunct_files/2/ERJ-01408-2015_Appendix_3.pdf)
Supplement: ERJ-01408-2015_Appendix_3.pdf [file ERJ-01408-2015_Appendix_3.pdf]

## Appendix 3: Spirometric Indices as Correlate of Physical Activity, Alternate Models

1 In this Appendix we evaluate possible mediators, confounders and drivers of any relationship  
2 between spirometric indices and physical activity. To maximize comparability between models,  
3 all potential predictors were chosen a priori and left in the model regardless of statistical  
4 significance.

5  
6 Tables 1.1, 1.2, and 1.3 consider different subsets of confounders to check for effect  
7 modification. Tables 2.1, 2.2, and 2.3 assess possible confounding by air pollution. Tables 3.1  
8 and 3.2 consider relationship between PA measures and spirometric flows (PEF, FEF25, FEF50,  
9 and FEF75).

### 10 11 **Overview of tables:**

#### 12 13 **Tables 1: Spirometric Indices as Correlate of Physical Activity (N=895) in Models of** 14 **Varying Complexity**

15 Table 1.1 Crude Model (corrected for sex, age and height)

16 Table 1.2 Basic Model (corrected for sex, age, height, weight, BMI, study centre,  
17 accelerometer wear-time, nutritional intervention, and parental education)

18 Table 1.3 Main Model (corrected for sex, age, height, weight, BMI, study centre,  
19 accelerometer wear-time, nutritional intervention, parental education, birthweight, breastfeeding,  
20 and pre- and postnatal tobacco-smoke exposure up to age 6).

#### 21 22 **Tables 2: Confounding Effect of Air Pollution (PM2.5, NOx)**

23 Table 2.1 Main Model of raw spirometric indices (measured in mL and mL/sec) as correlate  
24 of PA measures, PM 2.5 and NOx; N=858

25 Table 2.2 Main Model of raw spirometric indices as correlate of PA measures, PM 2.5 and  
26 NOx, with outliers excluded. Model contains all subjects with complete data whose (moderate,  
27 vigorous, MVPA, FEV1, FVC and FEV1/FVC) are all within 2 standard deviations of the sex-  
28 specific mean; N=710

29 Table 2.3 Main Model of GLI z-scores, instead of raw spirometric values, as correlate of PA  
30 measures, PM2.5, and NOx; N=858

#### 31 32 **Tables 3: Expiratory Flow Parameters as Correlate of Physical Activity (N=895);**

33 Z-scores do not exist for these indices

34 Table 3.1 Main model of raw spirometric indices (measured in mL and mL/sec)

35 Table 3.2 Main model with outliers excluded; contains the 743 subjects whose (moderate,  
36 vigorous, MVPA, FEV1, FVC and FEV1/FVC) are all within 2 standard deviations of the sex-  
37 specific mean.

## Appendix 3: Spirometric Indices as Correlate of Physical Activity, Alternate Models

### Spirometric Indices as Correlate of Physical Activity Crude (Simplest) Model

| Table 1.1 Crude Model: Spirometric Indices as Correlate of Physical Activity |                    |              |                    |               |                    |              |                    |              |
|------------------------------------------------------------------------------|--------------------|--------------|--------------------|---------------|--------------------|--------------|--------------------|--------------|
| Corrected for age, sex, and height at spirometry                             |                    |              |                    |               |                    |              |                    |              |
|                                                                              | FEV1 (mL)          |              | FVC (mL)           |               | FEV1/FVC (%)       |              | FEF2575 (mL/sec)   |              |
|                                                                              | Parameter estimate | P            | Parameter estimate | P             | Parameter estimate | P            | Parameter estimate | P            |
| Daily mean minutes                                                           |                    |              |                    |               |                    |              |                    |              |
| Moderate                                                                     | 1.58               | 0.12         | 2.23               | 0.065         | -0.0010            | 0.95         | 2.72               | 0.21         |
| Vigorous                                                                     | 0.34               | 0.78         | 1.97               | 0.20          | -0.027             | 0.15         | -0.66              | 0.81         |
| MVPA                                                                         | 0.73               | 0.25         | 1.49               | 0.060         | -0.0077            | 0.43         | 0.99               | 0.48         |
| MVPA quintile <sup>1</sup>                                                   | --                 | 0.073        | --                 | 0.11          | --                 | 0.085        | --                 | <b>0.042</b> |
| 1 <sup>2</sup>                                                               | 0                  | --           | 0                  | --            | 0                  | --           | 0                  | --           |
| 2 <sup>2</sup>                                                               | 0.063              | 1.0          | 56.7               | 0.25          | <b>-1.29</b>       | <b>0.034</b> | -157               | 0.076        |
| 3 <sup>2</sup>                                                               | 73.0               | 0.10         | 92.4               | 0.062         | -0.35              | 0.56         | 50.7               | 0.56         |
| 4 <sup>2</sup>                                                               | -7.59              | 0.86         | 52.1               | 0.29          | <b>-1.45</b>       | <b>0.017</b> | -126               | 0.15         |
| 5 <sup>2</sup>                                                               | <b>88.5</b>        | <b>0.046</b> | <b>128</b>         | <b>0.0098</b> | -0.62              | 0.31         | 49.5               | 0.57         |
| Percent days with MVPA >                                                     |                    |              |                    |               |                    |              |                    |              |
| 30 min                                                                       | <b>126</b>         | <b>0.015</b> | <b>131</b>         | <b>0.023</b>  | 0.112              | 0.87         | 174                | 0.090        |
| 45 min                                                                       | 93.3               | 0.090        | 113                | 0.065         | -0.218             | 0.77         | 135                | 0.22         |
| 60 min                                                                       | 57.5               | 0.38         | 113                | 0.12          | -1.19              | 0.18         | 21.5               | 0.87         |
| Any sport                                                                    | 8.22               | 0.81         | 10.6               | 0.78          | -0.048             | 0.92         | 1.57               | 0.98         |
| Any active transportation <sup>3</sup>                                       | -9.36              | 0.74         | 6.31               | 0.84          | -0.350             | 0.37         | -35.4              | 0.53         |

1) Top row is p-value for global null hypothesis (i.e. all quintiles equal.) Quintiles stratified by sex.  
2) P-value and parameter estimate for each quintile compared with the lowest (reference.)  
3) Active transportation defined as commuting to school by walking or cycling at least once during accelerometry. Moderate, vigorous and moderate-to-vigorous PA (MVPA) imputed for diaried nonwear time due to sport. Accelerometric cutpoints using Freedson's algorithm from [1, 2]  
**Bold** text if p<0.05

## Appendix 3: Spirometric Indices as Correlate of Physical Activity, Alternate Models

### Spirometric Indices as Correlate of Physical Activity Basic Model

|                                        | FEV1 (mL)          |       | FVC (mL)           |              | FEV1/FVC (%)       |               | FEF2575 (mL/sec)   |              |
|----------------------------------------|--------------------|-------|--------------------|--------------|--------------------|---------------|--------------------|--------------|
|                                        | Parameter estimate | P     | Parameter estimate | P            | Parameter estimate | P             | Parameter estimate | P            |
| Daily mean minutes                     |                    |       |                    |              |                    |               |                    |              |
| Moderate                               | 1.07               | 0.31  | 1.58               | 0.17         | -0.0079            | 0.59          | 1.35               | 0.53         |
| Vigorous                               | 1.08               | 0.41  | <b>2.86</b>        | <b>0.045</b> | -0.0357            | 0.050         | -0.630             | 0.81         |
| MVPA                                   | 0.751              | 0.27  | 1.45               | 0.051        | -0.0131            | 0.17          | 0.403              | 0.77         |
| MVPA quintile <sup>1</sup>             | --                 | 0.22  | --                 | 0.16         | --                 | <b>0.019</b>  | --                 | 0.058        |
| 1 <sup>2</sup>                         | 0                  | --    | 0                  | --           | 0                  | --            | 0                  | --           |
| 2 <sup>2</sup>                         | -6.30              | 0.88  | 58.2               | 0.21         | <b>-1.47</b>       | <b>0.013</b>  | <b>-174</b>        | <b>0.045</b> |
| 3 <sup>2</sup>                         | 43.3               | 0.31  | 64.5               | 0.17         | -0.491             | 0.41          | 8.83               | 0.92         |
| 4 <sup>2</sup>                         | -17.6              | 0.68  | 55.1               | 0.23         | <b>-1.78</b>       | <b>0.0026</b> | -157               | 0.070        |
| 5 <sup>2</sup>                         | 67.2               | 0.12  | <b>119</b>         | <b>0.011</b> | 0.0985             | 0.097         | 2.92               | 0.97         |
| Percent days with MVPA >               |                    |       |                    |              |                    |               |                    |              |
| 30 min                                 | 98.1               | 0.050 | <b>122</b>         | <b>0.026</b> | -0.432             | 0.54          | 108                | 0.29         |
| 45 min                                 | 73.8               | 0.16  | 105                | 0.070        | -0.566             | 0.44          | 90.6               | 0.40         |
| 60 min                                 | 51.1               | 0.42  | 113                | 0.099        | -1.384             | 0.11          | 3.33               | 0.98         |
| Any sport                              | 32.7               | 0.33  | 44.6               | 0.22         | -0.192             | 0.68          | 21.9               | 0.75         |
| Any active transportation <sup>3</sup> | 22.3               | 0.42  | 36.4               | 0.22         | -0.195             | 0.61          | 13.0               | 0.82         |

1) Top row is p-value for global null hypothesis (i.e. all quintiles equal.) Quintiles stratified by sex.  
2) P-value and parameter estimate for each quintile compared with the lowest (reference.)  
3) Active transportation defined as commuting to school by walking or cycling at least once during accelerometry. Moderate, vigorous and moderate-to-vigorous PA (MVPA) imputed for diaried nonwear time due to sport. Accelerometric cutpoints using Freedson's algorithm from [1, 2]  
**Bold text if p<0.05**

## Appendix 3: Spirometric Indices as Correlate of Physical Activity, Alternate Models

### Spirometric Indices as Correlate of Physical Activity

#### Main (Fully-Corrected) Model

From Table 2, main text

| <b>Table 1.3 Spirometric Indices as Correlate of Physical Activity</b>                                                                                                                                 |                    |       |                    |              |                    |               |                    |              |
|--------------------------------------------------------------------------------------------------------------------------------------------------------------------------------------------------------|--------------------|-------|--------------------|--------------|--------------------|---------------|--------------------|--------------|
| Corrected for age, sex, height, study centre, nutritional intervention, device wear time, BMI, parental education, birthweight, exclusive breastfeeding, prenatal tobacco, tobacco at home up to age 6 |                    |       |                    |              |                    |               |                    |              |
|                                                                                                                                                                                                        | FEV1 (mL)          |       | FVC (mL)           |              | FEV1/FVC (%)       |               | FEF2575 (mL/sec)   |              |
|                                                                                                                                                                                                        | Parameter estimate | P     | Parameter estimate | P            | Parameter estimate | P             | Parameter estimate | P            |
| Daily mean minutes                                                                                                                                                                                     |                    |       |                    |              |                    |               |                    |              |
| Moderate                                                                                                                                                                                               | 1.01               | 0.34  | 1.34               | 0.24         | -0.0048            | 0.75          | 1.58               | 0.46         |
| Vigorous                                                                                                                                                                                               | 0.98               | 0.46  | 2.64               | 0.066        | -0.034             | 0.060         | -0.44              | 0.87         |
| MVPA                                                                                                                                                                                                   | 0.70               | 0.31  | 1.30               | 0.084        | -0.011             | 0.23          | 0.55               | 0.69         |
| MVPA quintile <sup>1</sup>                                                                                                                                                                             | --                 | 0.22  | --                 | 0.21         | --                 | <b>0.022</b>  | --                 | <b>0.050</b> |
| 1 <sup>2</sup>                                                                                                                                                                                         | 0                  | --    | 0                  | --           | 0                  | --            | 0                  | --           |
| 2 <sup>2</sup>                                                                                                                                                                                         | -5.52              | 0.90  | 58.1               | 0.21         | <b>-1.45</b>       | <b>0.014</b>  | <b>-172</b>        | <b>0.048</b> |
| 3 <sup>2</sup>                                                                                                                                                                                         | 43.4               | 0.31  | 63.0               | 0.18         | -0.46              | 0.44          | 10.1               | 0.91         |
| 4 <sup>2</sup>                                                                                                                                                                                         | -19.0              | 0.66  | 51.1               | 0.27         | <b>-1.73</b>       | <b>0.0033</b> | -155               | 0.073        |
| 5 <sup>2</sup>                                                                                                                                                                                         | 67.0               | 0.12  | <b>113</b>         | <b>0.016</b> | -0.86              | 0.15          | 16.1               | 0.85         |
| Percent days with MVPA >                                                                                                                                                                               |                    |       |                    |              |                    |               |                    |              |
| 30 min                                                                                                                                                                                                 | 96.1               | 0.056 | <b>113</b>         | <b>0.038</b> | -0.33              | 0.64          | 117                | 0.26         |
| 45 min                                                                                                                                                                                                 | 72.3               | 0.18  | 95.5               | 0.10         | -0.43              | 0.56          | 106                | 0.33         |
| 60 min                                                                                                                                                                                                 | 48.0               | 0.45  | 98.7               | 0.15         | -1.20              | 0.17          | 23.6               | 0.86         |
| Any sport                                                                                                                                                                                              | 34.3               | 0.30  | 46.6               | 0.20         | -0.19              | 0.68          | 22.5               | 0.74         |
| Any active transportation <sup>3</sup>                                                                                                                                                                 | 23.9               | 0.39  | 40.0               | 0.18         | -0.19              | 0.68          | 11.9               | 0.83         |

1) P-value for global null hypothesis (all quintiles equal.) Quintiles stratified by sex.  
2) P-value and parameter estimate for each quintile compared with the lowest (reference.)  
3) Active transportation defined as commuting to school by walking or cycling at least once during accelerometry.  
Moderate, vigorous and moderate-to-vigorous PA (MVPA) imputed for diaried nonwear time due to sport. Accelerometric cutpoints using Freedson's algorithm from [1, 2].  
**Bold** text if p<0.05

## Appendix 3: Spirometric Indices as Correlate of Physical Activity, Alternate Models

### Sensitivity to Air Pollution

Main (Fully-Corrected) Model of **Spirometric Indices** as Correlate of Physical Activity,  
Corrected for Air Pollution (PM2.5 and NOx)

| <b>Table 2.1 Spirometric Indices as Correlate of Physical Activity</b>                                                                                                                                                                                                        |                    |              |                    |              |                    |               |                    |              |  |
|-------------------------------------------------------------------------------------------------------------------------------------------------------------------------------------------------------------------------------------------------------------------------------|--------------------|--------------|--------------------|--------------|--------------------|---------------|--------------------|--------------|--|
| Corrected for age, sex, height, study centre, nutritional intervention, device wear time, BMI, parental education, birthweight, exclusive breastfeeding, prenatal tobacco, tobacco at home up to age 6, <b>PM2.5 and NOx</b> (mean annual exposure at home address at age 15) |                    |              |                    |              |                    |               |                    |              |  |
|                                                                                                                                                                                                                                                                               | FEV1 (mL)          |              | FVC (mL)           |              | FEV1/FVC (%)       |               | FEF2575 (mL/sec)   |              |  |
|                                                                                                                                                                                                                                                                               | Parameter estimate | P            | Parameter estimate | P            | Parameter estimate | P             | Parameter estimate | P            |  |
| Daily mean minutes                                                                                                                                                                                                                                                            |                    |              |                    |              |                    |               |                    |              |  |
| Moderate                                                                                                                                                                                                                                                                      | 1.21               | 0.26         | 1.31               | 0.26         | 0.0005             | 0.98          | 2.22               | 0.31         |  |
| Vigorous                                                                                                                                                                                                                                                                      | 1.60               | 0.23         | <b>3.15</b>        | <b>0.030</b> | -0.030             | 0.10          | 0.430              | 0.88         |  |
| MVPA                                                                                                                                                                                                                                                                          | 0.956              | 0.17         | 1.42               | 0.061        | -0.0080            | 0.41          | 1.07               | 0.45         |  |
| MVPA quintile <sup>1</sup>                                                                                                                                                                                                                                                    | --                 | 0.082        | --                 | 0.17         | --                 | <b>0.023</b>  | --                 | <b>0.024</b> |  |
| 1 <sup>2</sup>                                                                                                                                                                                                                                                                | 0                  | --           | 0                  | --           | 0                  | --            | 0                  | --           |  |
| 2 <sup>2</sup>                                                                                                                                                                                                                                                                | -16.7              | 0.70         | 43.6               | 0.36         | <b>-1.45</b>       | <b>0.015</b>  | <b>-182</b>        | <b>0.040</b> |  |
| 3 <sup>2</sup>                                                                                                                                                                                                                                                                | 37.8               | 0.39         | 47.0               | 0.32         | -0.29              | 0.63          | 20.5               | 0.82         |  |
| 4 <sup>2</sup>                                                                                                                                                                                                                                                                | -23.7              | 0.58         | 39.4               | 0.40         | <b>-1.62</b>       | <b>0.0066</b> | -148               | 0.093        |  |
| 5 <sup>2</sup>                                                                                                                                                                                                                                                                | 84.5               | 0.057        | <b>119</b>         | <b>0.014</b> | -0.60              | 0.32          | 48.3               | 0.59         |  |
| Percent days with MVPA >                                                                                                                                                                                                                                                      |                    |              |                    |              |                    |               |                    |              |  |
| 30 min                                                                                                                                                                                                                                                                        | <b>114</b>         | <b>0.027</b> | <b>120</b>         | <b>0.032</b> | -0.0734            | 0.92          | 147                | 0.16         |  |
| 45 min                                                                                                                                                                                                                                                                        | 92.7               | 0.090        | 106                | 0.073        | -0.173             | 0.82          | 143                | 0.20         |  |
| 60 min                                                                                                                                                                                                                                                                        | 78.7               | 0.22         | 123                | 0.079        | -0.937             | 0.29          | 74.7               | 0.57         |  |
| Any sport                                                                                                                                                                                                                                                                     | 37.1               | 0.27         | 44.3               | 0.23         | -0.079             | 0.87          | 38.7               | 0.58         |  |
| Any active transportation <sup>3</sup>                                                                                                                                                                                                                                        | 23.9               | 0.41         | 28.2               | 0.37         | -0.043             | 0.91          | 37.4               | 0.52         |  |

1) P-value for global null hypothesis (all quintiles equal.) Quintiles stratified by sex.  
 2) P-value and parameter estimate for each quintile compared with the lowest (reference.)  
 3) Active transportation defined as walking or cycling to school at least once during accelerometry.  
 Moderate, vigorous and moderate-to-vigorous PA (MVPA) imputed for diaried nonwear time due to sport. Accelerometric cutpoints using Freedson's algorithm from [1, 2].  
 Data on air pollution from ESCAPE study; 858 subjects (96%) had data on air pollution. Details on data collection and definitions available in [3-7]  
**Bold text if p<0.05**

Baseline concentrations (mean (median); 5<sup>th</sup>, 95<sup>th</sup> percentile) were 15.0 (14.1); 12, 18 µg/m<sup>3</sup> for PM2.5, 33.6 (32.7); 24, 46 µg/m<sup>3</sup> for NOx.

## Appendix 3: Spirometric Indices as Correlate of Physical Activity, Alternate Models

### Sensitivity to Air Pollution; Outliers Excluded

Main (Fully-Corrected) Model of Spirometric Z-scores as Correlate of Physical Activity, Corrected for Air Pollution (PM2.5 and NOx)

| <b>Table 2.2 Spirometric Z-Scores as Correlate of Physical Activity, PM2.5 and NOx, Outliers Excluded</b><br>Corrected for age, sex, height, study centre, nutritional intervention, device wear time, BMI, parental education, birthweight, exclusive breastfeeding, prenatal tobacco, tobacco at home up to age 6, <b>PM2.5 and NOx</b> (mean annual exposure at home address at age 15)<br><b>Moderate, vigorous, MVPA, FEV1, FVC and FEV1/FVC all within 2 standard deviations of sex-specific mean; N=710</b> |                    |              |                    |              |                    |               |                    |       |
|--------------------------------------------------------------------------------------------------------------------------------------------------------------------------------------------------------------------------------------------------------------------------------------------------------------------------------------------------------------------------------------------------------------------------------------------------------------------------------------------------------------------|--------------------|--------------|--------------------|--------------|--------------------|---------------|--------------------|-------|
|                                                                                                                                                                                                                                                                                                                                                                                                                                                                                                                    | FEV1 * 1000        |              | FVC * 1000         |              | FEV1/FVC * 1000    |               | FEF2575 * 1000     |       |
|                                                                                                                                                                                                                                                                                                                                                                                                                                                                                                                    | Parameter estimate | P            | Parameter estimate | P            | Parameter estimate | P             | Parameter estimate | P     |
| Daily mean minutes                                                                                                                                                                                                                                                                                                                                                                                                                                                                                                 |                    |              |                    |              |                    |               |                    |       |
| Moderate                                                                                                                                                                                                                                                                                                                                                                                                                                                                                                           | 2.04               | 0.14         | 1.31               | 0.26         | 0.0055             | 0.78          | 3.13               | 0.28  |
| Vigorous                                                                                                                                                                                                                                                                                                                                                                                                                                                                                                           | 2.51               | 0.19         | <b>3.15</b>        | <b>0.030</b> | -0.040             | 0.13          | -2.06              | 0.61  |
| MVPA                                                                                                                                                                                                                                                                                                                                                                                                                                                                                                               | 1.55               | 0.10         | 1.42               | 0.062        | -0.0071            | 0.59          | 0.96               | 0.62  |
| MVPA quintile <sup>1</sup>                                                                                                                                                                                                                                                                                                                                                                                                                                                                                         | --                 | 0.17         | --                 | 0.16         | --                 | <b>0.017</b>  | --                 | 0.057 |
| 1 <sup>2</sup>                                                                                                                                                                                                                                                                                                                                                                                                                                                                                                     | 0                  | --           | 0                  | --           | 0                  | --            | 0                  | --    |
| 2 <sup>2</sup>                                                                                                                                                                                                                                                                                                                                                                                                                                                                                                     | 22.2               | 0.57         | 84.3               | 0.053        | <b>-1.28</b>       | <b>0.023</b>  | -135               | 0.11  |
| 3 <sup>2</sup>                                                                                                                                                                                                                                                                                                                                                                                                                                                                                                     | 42.8               | 0.29         | 52.8               | 0.22         | -0.27              | 0.63          | 26.3               | 0.76  |
| 4 <sup>2</sup>                                                                                                                                                                                                                                                                                                                                                                                                                                                                                                     | -2.79              | 0.95         | 61.3               | 0.16         | <b>-1.52</b>       | <b>0.0078</b> | -135               | 0.11  |
| 5 <sup>2</sup>                                                                                                                                                                                                                                                                                                                                                                                                                                                                                                     | <b>103</b>         | <b>0.031</b> | <b>120</b>         | <b>0.018</b> | -0.053             | 0.94          | 80.1               | 0.42  |
| Percent days with MVPA >                                                                                                                                                                                                                                                                                                                                                                                                                                                                                           |                    |              |                    |              |                    |               |                    |       |
| 30 min                                                                                                                                                                                                                                                                                                                                                                                                                                                                                                             | <b>117</b>         | <b>0.027</b> | <b>128</b>         | <b>0.024</b> | 0.028              | 0.97          | 119                | 0.28  |
| 45 min                                                                                                                                                                                                                                                                                                                                                                                                                                                                                                             | 108                | 0.071        | 107                | 0.096        | 0.298              | 0.72          | 129                | 0.30  |
| 60 min                                                                                                                                                                                                                                                                                                                                                                                                                                                                                                             | 99.0               | 0.20         | <b>164</b>         | <b>0.048</b> | -1.170             | 0.28          | -17.4              | 0.91  |
| Any sport                                                                                                                                                                                                                                                                                                                                                                                                                                                                                                          | -10.4              | 0.76         | 16.3               | 0.65         | -0.615             | 0.18          | -43.0              | 0.53  |
| Any active transportation <sup>2</sup>                                                                                                                                                                                                                                                                                                                                                                                                                                                                             | -9.36              | 0.74         | -3.57              | 0.91         | -0.170             | 0.66          | -38.5              | 0.51  |

1) Top row is p-value for global null hypothesis (i.e. all quintiles equal.) Quintiles stratified by sex.  
 2) P-value and parameter estimate for each quintile compared with the lowest (reference.)  
 3) Active transportation defined as commuting to school by walking or cycling at least once during accelerometry.  
 Moderate, vigorous and moderate-to-vigorous PA (MVPA) imputed for diaried nonwear time due to sport. Accelerometric cutpoints using Freedson's algorithm from [1, 2]  
 Data on air pollution from ESCAPE study. Details on data collection and definitions available in [3-7]  
 Extreme values are those 152 subjects whose (FEV1, FVC, FEV1/FVC, moderate, vigorous, or MVPA) was more than 2 standard deviations from sex-specific mean. Of the remaining 743 (83% of 895), 710 had data on air pollution.  
**Bold** text if p<0.05

Baseline concentrations (mean (median); 5<sup>th</sup>, 95<sup>th</sup> percentile) were 15.0 (14.1); 12, 18 µg/m<sup>3</sup> for PM2.5, 33.6 (32.7); 24, 46 µg/m<sup>3</sup> for NOx.

## Appendix 3: Spirometric Indices as Correlate of Physical Activity, Alternate Models

### Sensitivity to Air Pollution

#### Spirometric Z-Scores as Correlate of Physical Activity

#### Main (Fully-Corrected) Model, Corrected for PM2.5 and NOx

|                                        | FEV1 * 1000        |              | FVC * 1000         |               | FEV1/FVC * 1000    |               | FEF2575 * 1000     |              |
|----------------------------------------|--------------------|--------------|--------------------|---------------|--------------------|---------------|--------------------|--------------|
|                                        | Parameter estimate | P            | Parameter estimate | P             | Parameter estimate | P             | Parameter estimate | P            |
| Daily mean minutes                     |                    |              |                    |               |                    |               |                    |              |
| Moderate                               | 2.29               | 0.33         | 2.43               | 0.28          | -0.030             | 0.99          | 2.23               | 0.25         |
| Vigorous                               | 3.48               | 0.24         | <b>6.64</b>        | <b>0.020</b>  | -5.18              | 0.088         | -0.31              | 0.92         |
| MVPA                                   | 1.93               | 0.21         | 2.85               | 0.055         | -1.42              | 0.37          | 0.87               | 0.58         |
| MVPA quintile <sup>1</sup>             | --                 | 0.085        | --                 | 0.13          | --                 | <b>0.019</b>  | --                 | <b>0.030</b> |
| 1 <sup>2</sup>                         | 0                  | --           | 0                  | --            | 0                  | --            | 0                  | --           |
| 2 <sup>2</sup>                         | -30.7              | 0.75         | 95.7               | 0.30          | <b>-250</b>        | <b>0.011</b>  | <b>-198</b>        | <b>0.042</b> |
| 3 <sup>2</sup>                         | 102                | 0.29         | 119                | 0.20          | -71.4              | 0.47          | 33.1               | 0.73         |
| 4 <sup>2</sup>                         | -37.0              | 0.70         | 103                | 0.26          | <b>-282</b>        | <b>0.0040</b> | -156               | 0.11         |
| 5 <sup>2</sup>                         | 189                | 0.052        | <b>250</b>         | <b>0.0079</b> | -114               | 0.26          | 42.6               | 0.67         |
| Percent days with MVPA >               |                    |              |                    |               |                    |               |                    |              |
| 30 min                                 | <b>254</b>         | <b>0.025</b> | <b>261</b>         | <b>0.017</b>  | -23.2              | 0.84          | 128                | 0.29         |
| 45 min                                 | 198                | 0.099        | 222                | 0.055         | -34.4              | 0.78          | 142                | 0.30         |
| 60 min                                 | 152                | 0.28         | 245                | 0.073         | -173               | 0.23          | -29.5              | 0.87         |
| Any sport                              | 69.8               | 0.35         | 78.9               | 0.27          | -40.8              | 0.60          | -55.6              | 0.47         |
| Any active transportation <sup>2</sup> | 65.3               | 0.30         | 58.6               | 0.34          | 7.92               | 0.90          | -34.7              | 0.59         |

1) Top row is p-value for global null hypothesis (i.e. all quintiles equal.) Quintiles stratified by sex.  
2) P-value and parameter estimate for each quintile compared with the lowest (reference.)  
3) Active transportation defined as commuting to school by walking or cycling at least once during accelerometry.  
Moderate, vigorous and moderate-to-vigorous PA (MVPA) imputed for diaried nonwear time due to sport. Accelerometric cutpoints using Freedson's algorithm from [1, 2]  
**Bold** text if p<0.05  
Extreme values are those 152 subjects whose (FEV1, FVC, FEV1/FVC, moderate, vigorous, or MVPA) was more than 2 standard deviations from sex-specific mean. Of the remaining 743 (83% of 895), 710 had data on air pollution.

Baseline concentrations (mean (median); 5<sup>th</sup>, 95<sup>th</sup> percentile) were 15.0 (14.1); 12, 18 µg/m<sup>3</sup> for PM2.5, 33.6 (32.7); 24, 46 µg/m<sup>3</sup> for NOx.

## Appendix 3: Spirometric Indices as Correlate of Physical Activity, Alternate Models

### Alternate Outcomes: Spirometric Flows as Correlate of Physical Activity Main (Fully-Corrected) Model

| <b>Table 3.1 Spirometric Flows as Correlate of Physical Activity</b>                                                                                                                                       |                    |              |                    |       |                    |              |                    |              |  |
|------------------------------------------------------------------------------------------------------------------------------------------------------------------------------------------------------------|--------------------|--------------|--------------------|-------|--------------------|--------------|--------------------|--------------|--|
| Corrected for age, sex, height, study centre, nutritional intervention, device wear time, BMI, parental education, birthweight, exclusive breastfeeding, prenatal tobacco, and tobacco at home up to age 6 |                    |              |                    |       |                    |              |                    |              |  |
|                                                                                                                                                                                                            | PEF (ml/s)         |              | FEF25 (ml/s)       |       | FEF50 (ml/s)       |              | FEF75 (ml/s)       |              |  |
|                                                                                                                                                                                                            | Parameter estimate | P            | Parameter estimate | P     | Parameter estimate | P            | Parameter estimate | P            |  |
| Daily mean minutes                                                                                                                                                                                         |                    |              |                    |       |                    |              |                    |              |  |
| Moderate                                                                                                                                                                                                   | 4.03               | 0.12         | 1.75               | 0.50  | 2.80               | 0.25         | -0.611             | 0.72         |  |
| Vigorous                                                                                                                                                                                                   | <b>6.65</b>        | <b>0.037</b> | 3.51               | 0.28  | 0.020              | 0.99         | -2.31              | 0.29         |  |
| MVPA                                                                                                                                                                                                       | <b>3.54</b>        | <b>0.034</b> | 1.71               | 0.32  | 1.20               | 0.45         | -0.892             | 0.43         |  |
| MVPA quintile <sup>1</sup>                                                                                                                                                                                 | --                 | 0.075        | --                 | 0.20  | --                 | <b>0.029</b> | --                 | 0.066        |  |
| 1 <sup>2</sup>                                                                                                                                                                                             | 0                  | --           | 0                  | --    | 0                  | --           | 0                  | --           |  |
| 2 <sup>2</sup>                                                                                                                                                                                             | -107               | 0.30         | -196               | 0.064 | <b>-208</b>        | <b>0.034</b> | -133               | 0.056        |  |
| 3 <sup>2</sup>                                                                                                                                                                                             | -49.7              | 0.63         | -20.2              | 0.85  | 49.7               | 0.61         | -44.8              | 0.52         |  |
| 4 <sup>2</sup>                                                                                                                                                                                             | -109               | 0.29         | -97.4              | 0.36  | -133               | 0.18         | <b>-178</b>        | <b>0.010</b> |  |
| 5 <sup>2</sup>                                                                                                                                                                                             | 151                | 0.15         | 32.4               | 0.76  | 41.3               | 0.68         | -45.7              | 0.52         |  |
| Percent days with MVPA >                                                                                                                                                                                   |                    |              |                    |       |                    |              |                    |              |  |
| 30 min                                                                                                                                                                                                     | 164                | 0.18         | 135                | 0.28  | 159                | 0.17         | 21.3               | 0.80         |  |
| 45 min                                                                                                                                                                                                     | 173                | 0.18         | 126                | 0.34  | 149                | 0.23         | 11.5               | 0.90         |  |
| 60 min                                                                                                                                                                                                     | 212                | 0.17         | 99.1               | 0.53  | 55.9               | 0.70         | -96.1              | 0.35         |  |
| Any sport                                                                                                                                                                                                  | 99.2               | 0.22         | 75.8               | 0.36  | 74.4               | 0.33         | -29.5              | 0.59         |  |
| Any active transportation <sup>3</sup>                                                                                                                                                                     | 17.9               | 0.79         | 24.7               | 0.72  | 9.54               | 0.88         | 16.2               | 0.72         |  |

1) Top row is p-value for global null hypothesis (i.e. all quintiles equal.) Quintiles stratified by sex.  
2) P-value and parameter estimate for each quintile compared with the lowest (reference.)  
3) Active transportation defined as commuting to school by walking or cycling at least once during accelerometry. Moderate, vigorous and moderate-to-vigorous PA (MVPA) imputed for diaried nonwear time due to sport. Accelerometric cutpoints using Freedson's algorithm from [1, 2].  
**Bold text if p<0.05.**



## Appendix 3: Spirometric Indices as Correlate of Physical Activity, Alternate Models

### Alternate Outcomes: Spirometric Flows as Correlate of Physical Activity Main (Fully-Corrected) Model, Outliers Excluded

| <b>Table 3.2 Spirometric Flows as Correlate of Physical Activity</b><br>Corrected for age, sex, height, study centre, nutritional intervention, device wear time, BMI, parental education, birthweight, exclusive breastfeeding, prenatal tobacco, and tobacco at home up to age 6<br><b>Moderate, vigorous, MVPA, FEV1, FVC and FEV1/FVC all within 2 standard deviations of sex-specific mean (N=743, 83% of 895)</b> |                    |       |                    |       |                    |       |                    |              |
|-------------------------------------------------------------------------------------------------------------------------------------------------------------------------------------------------------------------------------------------------------------------------------------------------------------------------------------------------------------------------------------------------------------------------|--------------------|-------|--------------------|-------|--------------------|-------|--------------------|--------------|
|                                                                                                                                                                                                                                                                                                                                                                                                                         | PEF (ml/s)         |       | FEF25 (ml/s)       |       | FEF50 (ml/s)       |       | FEF75 (ml/s)       |              |
|                                                                                                                                                                                                                                                                                                                                                                                                                         | Parameter estimate | P     | Parameter estimate | P     | Parameter estimate | P     | Parameter estimate | P            |
| Daily mean minutes                                                                                                                                                                                                                                                                                                                                                                                                      |                    |       |                    |       |                    |       |                    |              |
| Moderate                                                                                                                                                                                                                                                                                                                                                                                                                | 2.11               | 0.55  | 2.91               | 0.42  | 4.28               | 0.19  | -0.328             | 0.88         |
| Vigorous                                                                                                                                                                                                                                                                                                                                                                                                                | 2.26               | 0.63  | -1.43              | 0.77  | -2.83              | 0.52  | 4.28               | 0.19         |
| MVPA                                                                                                                                                                                                                                                                                                                                                                                                                    | 1.52               | 0.52  | 0.960              | 0.69  | 1.23               | 0.58  | -2.83              | 0.52         |
| MVPA quintile <sup>1</sup>                                                                                                                                                                                                                                                                                                                                                                                              | --                 | 0.070 | --                 | 0.26  | --                 | 0.063 | --                 | 0.080        |
| 1 <sup>2</sup>                                                                                                                                                                                                                                                                                                                                                                                                          | 0                  | --    | 0                  | --    | 0                  | --    | 0                  | --           |
| 2 <sup>2</sup>                                                                                                                                                                                                                                                                                                                                                                                                          | -94.1              | 0.36  | -183               | 0.084 | -152               | 0.12  | -96.0              | 0.15         |
| 3 <sup>2</sup>                                                                                                                                                                                                                                                                                                                                                                                                          | -109               | 0.29  | -52.4              | 0.62  | 58.8               | 0.54  | -42.2              | 0.52         |
| 4 <sup>2</sup>                                                                                                                                                                                                                                                                                                                                                                                                          | -124               | 0.24  | -90.6              | 0.40  | -96.4              | 0.32  | <b>-169</b>        | <b>0.012</b> |
| 5 <sup>2</sup>                                                                                                                                                                                                                                                                                                                                                                                                          | 181                | 0.13  | 65.4               | 0.59  | 119                | 0.29  | -7.79              | 0.92         |
| Percent days with MVPA >                                                                                                                                                                                                                                                                                                                                                                                                |                    |       |                    |       |                    |       |                    |              |
| 30 min                                                                                                                                                                                                                                                                                                                                                                                                                  | 126                | 0.35  | 104                | 0.44  | 170                | 0.17  | 16.9               | 0.84         |
| 45 min                                                                                                                                                                                                                                                                                                                                                                                                                  | 133                | 0.38  | 73.1               | 0.63  | 173                | 0.22  | 21.1               | 0.83         |
| 60 min                                                                                                                                                                                                                                                                                                                                                                                                                  | 104                | 0.60  | 5.63               | 0.98  | 7.62               | 0.97  | -185               | 0.14         |
| Any sport                                                                                                                                                                                                                                                                                                                                                                                                               | -28.8              | 0.73  | -47.3              | 0.58  | -4.79              | 0.95  | -84.8              | 0.12         |
| Any active transportation <sup>3</sup>                                                                                                                                                                                                                                                                                                                                                                                  | -78.0              | 0.26  | -53.2              | 0.45  | -67.3              | 0.29  | -19.3              | 0.66         |

1) Top row is p-value for global null hypothesis (i.e. all quintiles equal.) Quintiles stratified by sex.  
 2) P-value and parameter estimate for each quintile compared with the lowest (reference.)  
 3) Active transportation defined as walking or cycling to school at least once during accelerometry.  
 Moderate, vigorous and moderate-to-vigorous PA (MVPA) imputed for diaried nonwear time due to sport. Accelerometric cutpoints using Freedson's algorithm from [1, 2].  
**Bold text if p<0.05.**

## Appendix 3: Spirometric Indices as Correlate of Physical Activity, Alternate Models

### References:

1. Freedson P; Pober, D; Janz, KF Calibration of accelerometer output for children. *Medicine and Science in Sports and Exercise* 2005: 37(11(Suppl)): 523-530.
2. Trost SG; Loprinzi, PD; Moore, R Pfeiffer, KA. Comparison of accelerometer cut points for predicting activity intensity in youth. *Med Sci Sports Exerc* 2010: 43(7): 1360-1368.
3. Eeftens M; Beelen, R; de Hoogh, K; Bellander, T; Cesaroni, G; Cirach, M; Declercq, C; Dèdelè, A; Dons, E; de Nazelle, A; Dimakopoulou, K; Eriksen, K; Falq, G; Fischer, P; Galassi, C; Gražulevičienė, R; Heinrich, J; Hoffmann, B; Jerrett, M; Keidel, D; Korek, M; Lanki, T; Lindley, S; Madsen, C; Mölter, A; Nádor, G; Nieuwenhuijsen, M; Nonnemacher, M; Pedeli, X; Raaschou-Nielsen, O; Patelarou, E; Quass, U; Ranzi, A; Schindler, C; Stempfelet, M; Stephanou, E; Sugiri, D; Tsai, MY; Yli-Tuomi, T; Varró, MJ; Vienneau, D; Klot, Sv; Wolf, K; Brunekreef, B; Hoek, G. Development of Land Use Regression Models for PM<sub>2.5</sub>, PM<sub>2.5</sub> Absorbance, PM<sub>10</sub> and PM<sub>coarse</sub> in 20 European Study Areas; Results of the ESCAPE Project. *Environ Sci Technol* 2012: 46(20): 11195-11205.
4. Marloes E; Tsai, MY; Amppe, C; Anwander, B; Beelen, R; Bellander, T; Cesaroni, G; Cirach, M; Cyrus, J; de Hoogh, K; de Nazelle, A; deVocht, F; Declercq, C; Dèdelè, A; Eriksen, K; Galassi, C; Gražulevičienė, R; Grivas, G; Heinrich, J; Hoffmann, B; Iakovides, M; Ineichen, A; Katsouyanni, K; Korek, M; Krämer, U; Kuhlbusch, T; Lanki, T; Madsen, C; Meliefste, K; Mölter, A; Mosler, G; Nieuwenhuijsen, M; Oldenwening, M; Pennanen, A; Probst-Hensch, N; Quass, U; Raaschou-Nielsen, O; Ranzi, A; Stephanou, E; Sugiri, D; Udvardya, O; Vaskövia, E; Weinmayr, G; Brunekreef, B; Hoek, G. Spatial variation of PM<sub>2.5</sub>, PM<sub>10</sub>, PM<sub>2.5</sub> absorbance and PM<sub>coarse</sub> concentrations between and within 20 European study areas and the relationship with NO<sub>2</sub> – Results of the ESCAPE project. *Atmospheric Environment* 2012: 62: 303-317.
5. Mölter A; Simpson, A; Berdel, D; Brunekreef, B; Custovic, A; Cyrus, J; de Jongste, J; de Vocht, F; Fuertes, E; Gehring, U; Gruzjeva, O; Heinrich, J; Hoek, G; Hoffmann, B; Klümper, C; Korek, M; Kuhlbusch, TAJ; Lindley, S; Postma, D; Tischer, C; Wijga, A; Pershagen, G; Agius, R. A multicentre study of air pollution exposure and childhood asthma prevalence: the ESCAPE project. *European Respiratory Journal* 2015: 45(3): 610-624.
6. Beelen R; Hoek, G; Vienneau, D; Eeftens, M; Dimakopoulou, K; Pedeli, X; Tsai, MY; Künzli, N; Schikowski, T; Marcon, A; Eriksen, KT; Raaschou-Nielsen, O; Stephanou, E; Patelarou, E; Lanki, T; Yli-Tuomi, T; Declercq, C; Falq, G; Stempfelet, M; Birk, M; Cyrus, J; von Klot, S; Nádor, G; János Varró, M; Dèdelè, A; Gražulevičienė, R; Mölter, A; Lindley, S; Madsen, C; Cesaroni, G; Ranzi, A; Badaloni, C; Hoffmann, B; Nonnemacher, M; Krämer, U; Kuhlbusch, T; Cirach, M; de Nazelle, A; Nieuwenhuijsen, M; Bellander, T; Korek, M; Olsson, D; Strömgren, M; Dons, E; Jerrett, M; Fischer, P; Wang, M; Brunekreef, B; de Hoogh, K. Development of NO<sub>2</sub> and NO<sub>x</sub> land use regression models for estimating air pollution exposure in 36 study areas in Europe – The ESCAPE project *Atmospheric Environment* 2013: 72: 10–23.
7. Fuertes E; Bracher, J; Flexeder, C; Markevych, I; Klümper, C; Hoffmann, B; Krämer, U; von Berg, A; Bauer, CP; Koletzko, S; Berdel, D; Heinrich, J; Schulz, H. Long-term air pollution exposure and lung function in 15 year-old adolescents living in an urban and rural area in Germany: The GINIplus and LISAPLUS cohorts. *Int J Hyg Environ Health* 2015: 218(7): 656-665.
8. Quanjer PH; Stanojevic, S; Stocks, J; Cole, TJ. GLI-2012 : All-Age Multi-Ethnic Reference Values for Spirometry. Global Lung Initiative, 2012.
